# Supplementary material for: Earth’s future climate and its variability simulated at 9 km global resolution
Source: Copernicus journal article supplement (doi:10.5194/egusphere-2024-2491), 2024-08-09
Supplement: Supplementary file 1 [file egusphere-2024-2491-supplement.pdf]

1 *Supplement of*

2

3 **Earth's future climate and its variability simulated at 9 km global**  
4 **resolution**

5 Ja-Yeon Moon<sup>1,2</sup>, Jan Streffing<sup>3</sup>, Sun-Seon Lee<sup>1,2</sup>, Tido Semmler<sup>3,4</sup>, Miguel Andrés-Martínez<sup>3</sup>, Jiao  
6 Chen<sup>3</sup>, Eun-Byeoul Cho<sup>1,2</sup>, Jung-Eun Chu<sup>5</sup>, Christian Franzke<sup>1,6</sup>, Jan P. Gärtner<sup>3</sup>, Rohit Ghosh<sup>3</sup>, Jan  
7 Hegewald<sup>3,7</sup>, Songye Hong<sup>8</sup>, Nikolay Koldunov<sup>3</sup>, June-Yi Lee<sup>1,6</sup>, Zihao Lin<sup>5</sup>, Chao Liu<sup>9</sup>, Svetlana Loza<sup>3</sup>,  
8 Wonsun Park<sup>1,6</sup>, Woncheol Roh<sup>1,2</sup>, Dmitry V. Sein<sup>3,10</sup>, Sahil Sharma<sup>1,2</sup>, Dmitry Sidorenko<sup>3</sup>, Jun-Hyeok  
9 Son<sup>1,2</sup>, Malte F. Stuecker<sup>11</sup>, Qiang Wang<sup>3</sup>, Gyuseok Yi<sup>1,6</sup>, Martina Zapponini<sup>3</sup>, Thomas Jung<sup>3,12\*</sup>, Axel  
10 Timmermann<sup>1,2\*</sup>

11 <sup>1</sup>IBS Center for Climate Physics, Busan, 46241, Republic of Korea

12 <sup>2</sup>Pusan National University, Busan, 46241, Republic of Korea

13 <sup>3</sup>Alfred Wegener Institute, Helmholtz Centre for Polar and Marine Research, Bremerhaven, 27570, Germany

14 <sup>4</sup>Met Éireann, 65-67 Glasnevin Hill, D09 Y921, Dublin, Ireland

15 <sup>5</sup>Low-Carbon and Climate Impact Research Centre, School of Energy and Environment, City University of Hong Kong, Hong  
16 Kong, China

17 <sup>6</sup>Department of Climate System, Pusan National University, Busan, 46241, Republic of Korea

18 <sup>7</sup>Gauß-IT-Zentrum, Braunschweig University of Technology (GITZ), Braunschweig, Germany

19 <sup>8</sup>SSG services, Lenovo, Seoul, 06141, Republic of Korea

20 <sup>9</sup>Irreversible Climate Change Research Center, Yonsei University, Seoul, 03722, Republic of Korea

21 <sup>10</sup>Shirshov Institute of Oceanology, Russian Academy of Science, Moscow 117997, Russia

22 <sup>11</sup>Department of Oceanography and International Pacific Research Center, University of Hawai'i at Mānoa, Honolulu, 96822,  
23 USA

24 <sup>12</sup>Department of Physics and Electrical Engineering, University of Bremen, 28359, Bremen, Germany

25 *Correspondence to:* Thomas Jung (Thomas.Jung@awi.de) and Axel Timmermann (axel@ibsclimate.org)

26

27

|    |                                                                |
|----|----------------------------------------------------------------|
| 28 | <b>Contents of this file</b>                                   |
| 29 | - Method for Okubo-Weiss-Zeta Parameter with equations (S1-S2) |
| 30 | - Table S1                                                     |
| 31 | - Figures S1 to S10                                            |
| 32 |                                                                |

33 **Equations (S1-S2):**

34 The OWZP is a resolution independent tracking method to detect tropical cyclones (Tory et al., 2013a, b). It primarily relies  
35 on Okubo-Weiss Parameter and other large-scale variables that are interpolated to  $1^\circ \times 1^\circ$  grid. Here we provide a brief  
36 introduction to the OWZP tracking scheme. The detailed algorithm is explained in the references.

37 The Okubo-Weiss Parameter is a measure of the low-deformation vorticity

38 
$$OW = \xi^2 - (E^2 + F^2) \quad (S1)$$

39 where  $E = \left(\frac{\partial u}{\partial x}\right) - \left(\frac{\partial v}{\partial y}\right)$  and  $F = \left(\frac{\partial v}{\partial x}\right) + \left(\frac{\partial u}{\partial y}\right)$  are the square of the stretching and shearing deformation, respectively. Then,

40 Okubo-Weiss-Zeta parameter is calculated by calculating vertical component of absolute vorticity ( $\eta = \xi + f$ ) weighted by  
41  $OW_{norm} = [\xi^2 - (E^2 + F^2)]/\xi^2$  and multiplied by the sign of Coriolis parameter  $f$  for a consistent cyclonic vorticity in both  
42 hemispheres:

43 
$$OWZ = \eta \times (OW_{norm}, 0) \times sign(f) \quad (S2)$$

44 Therefore,  $OWZ$  and absolute vorticity have a similar magnitude, and the  $OWZ$  to  $\eta$  ratio gets smaller when the flow has  
45 strong deformation.

46 The potential to support TC formations is identified by the “initial” thresholds (Table SX) for  $OWZ$  at 850 hPa and 500 hPa,  
47 relative humidity at 950 hPa and 700 hPa, vertical wind shear between 850 hPa and 200 hPa, and specific humidity at 950 hPa.

48 The threshold values were obtained from Raavi et al. (2023).

49 Neighboring grid points that meet the initial thresholds are merged together and create a single “clump”, representing a storm  
50 at a specific time. Weaker and smaller in close proximity are eliminated. The identified clumps are then tracked forward in  
51 time until no clumps remain. At each position along the storm track, the storm is assigned individual values for  $OWZ$ , relative  
52 humidity, vertical wind shear, and specific humidity. If the updated values pass the “core” threshold (Table S1), it is labeled  
53 as “true”. If a sequence of clumps meets consecutive “true” labels for 48 h or more, the storm is considered as a tropical  
54 cyclone. In our study, we utilized 6 hourly data, therefore, the criteria for identifying a tropical cyclone is based on the presence  
55 of nine consecutive “true” clumps along the track, with the ninth “true” position being designated as the location of storm  
56 genesis.

57

58

59

60

61

62

63

64

65 **Table S1: Initial and core thresholds for tracking tropical cyclones (TCs) using Okubo–Weiss–Zeta parameter (OWZP) detection**  
66 **scheme.**

| Criterion | OWZ <sub>850</sub>                   | OWZ <sub>500</sub>                   | RH <sub>950</sub> | RH <sub>700</sub> | VWS <sub>850-200</sub>    | SH <sub>950</sub>        |
|-----------|--------------------------------------|--------------------------------------|-------------------|-------------------|---------------------------|--------------------------|
| Initial   | $> 50 \times 10^{-6} \text{ s}^{-1}$ | $> 40 \times 10^{-6} \text{ s}^{-1}$ | $> 70 \%$         | $> 50\%$          | $< 25 \text{ m s}^{-1}$   | $> 10 \text{ g kg}^{-1}$ |
| Core      | $> 60 \times 10^{-6} \text{ s}^{-1}$ | $> 50 \times 10^{-6} \text{ s}^{-1}$ | $> 85 \%$         | $> 70\%$          | $< 12.5 \text{ m s}^{-1}$ | $> 14 \text{ g kg}^{-1}$ |

67

68

69

70

Figures S1 to S9:

71

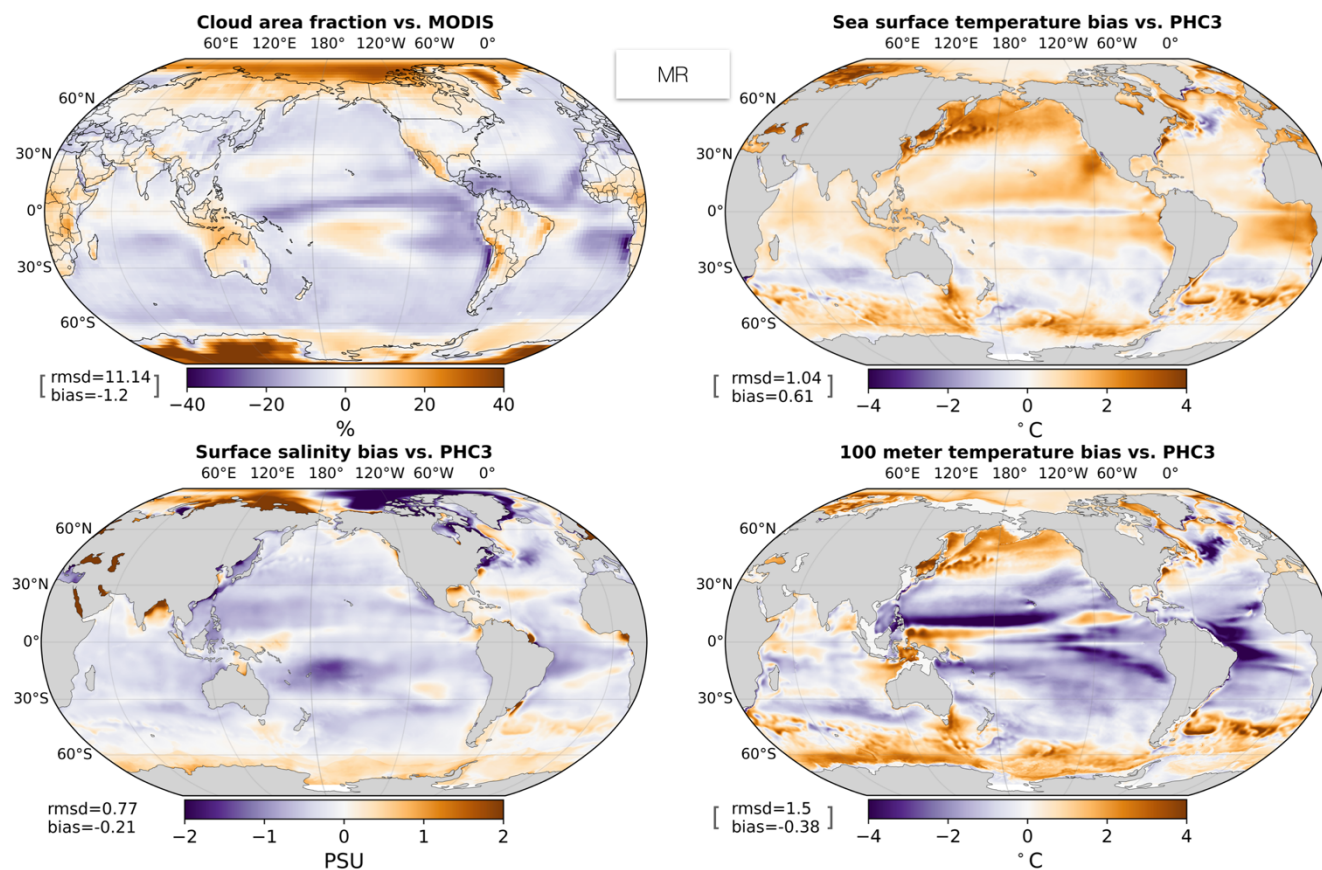

72

73

74

75

**Figure S1: Bias of simulated total cloudiness in AWI-CM3 MR historical (2002-2012) simulation (upper left) relative to MODIS cloud product (2000-2011) (Kato et al., 2018). Other panels: bias maps for sea surface temperature, sea surface salinity and 100 m temperature relative to the observational PHC climatology (1900-1997) (Steele et al., 2001).**

76

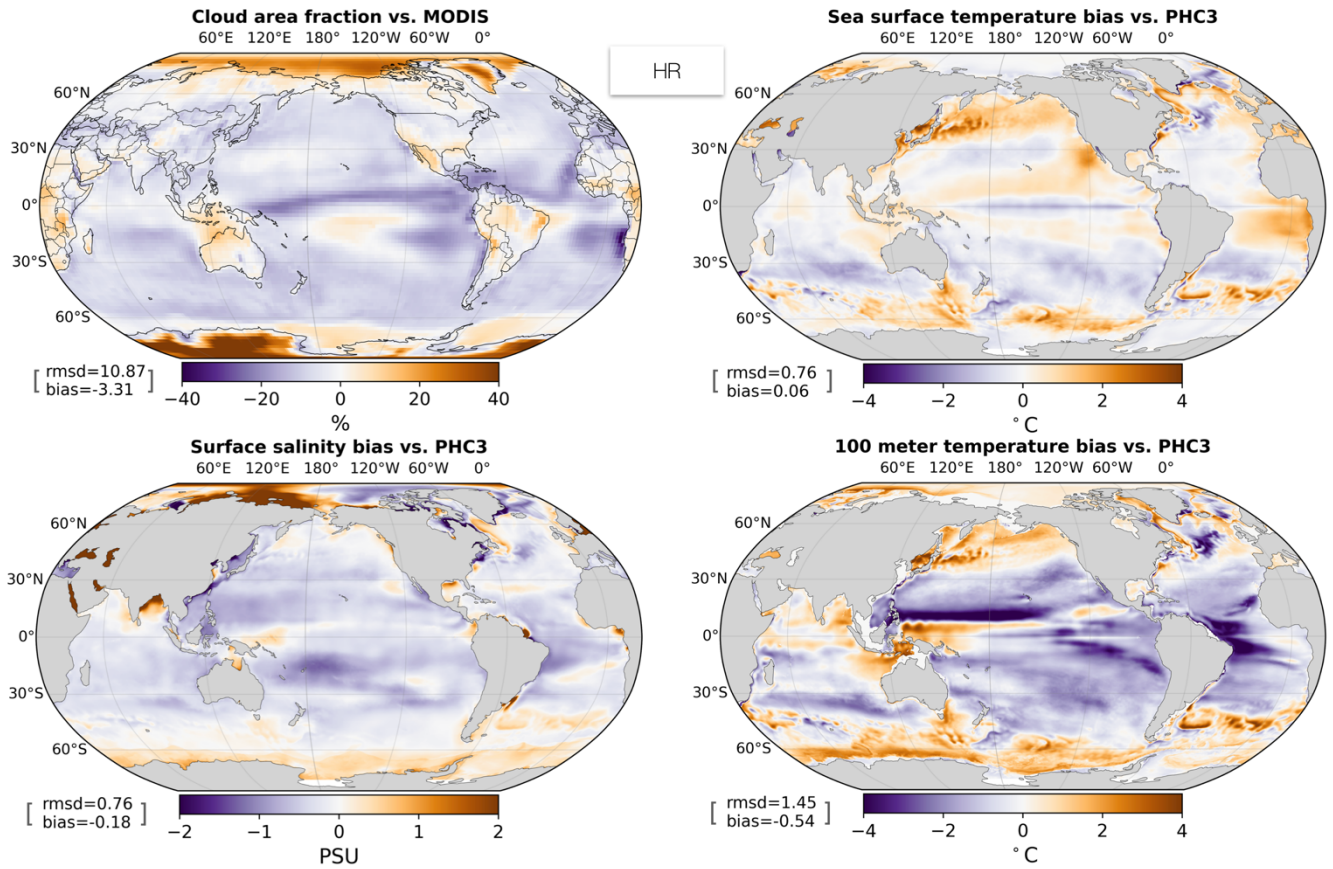

77

78

79

80

**Figure S2: Bias of simulated total cloudiness in AWI-CM3 HR 2000s (2002-2012) snapshot simulation (upper left) relative to MODIS cloud product (2000-2011) (Kato et al., 2018). Other panels: bias maps for sea surface temperature, sea surface salinity and 100 m temperature relative to the observational PHC climatology (Steele et al., 2001).**

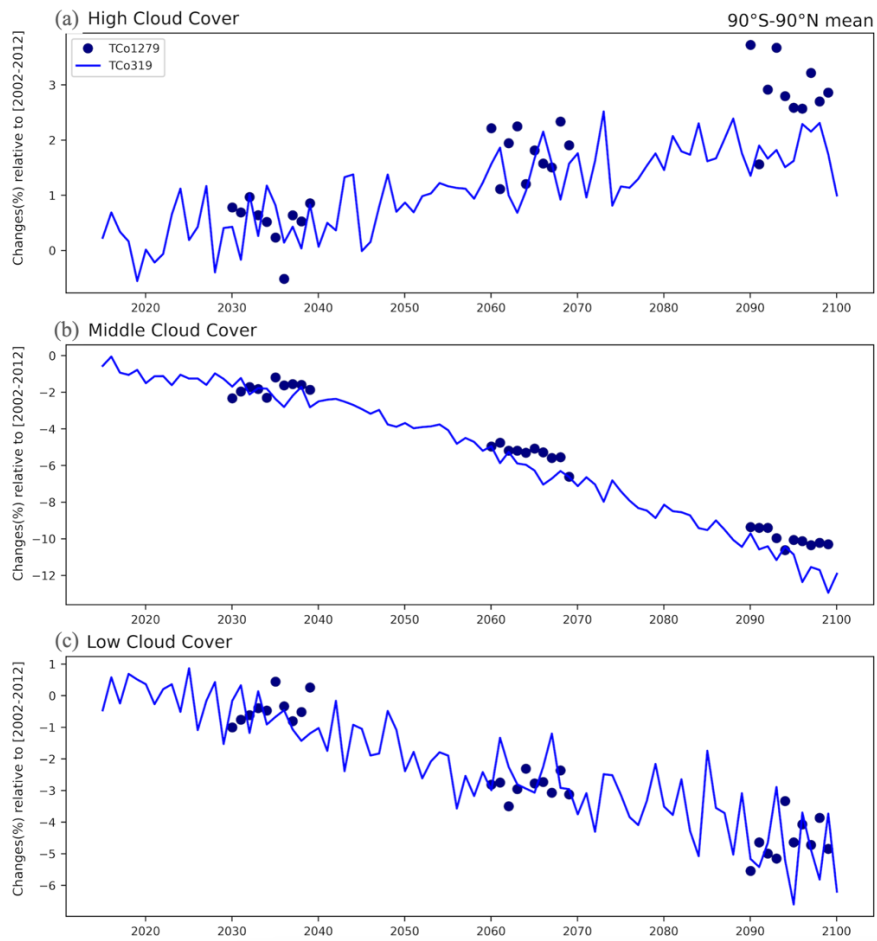

81

82 **Figure S3: Annual mean difference of global mean (a) high, (b) middle, (c) low cloud cover in MR simulation (blue line) and HR**  
 83 **(navy dot) snapshot simulations relative to 2000s.**

84 .

85

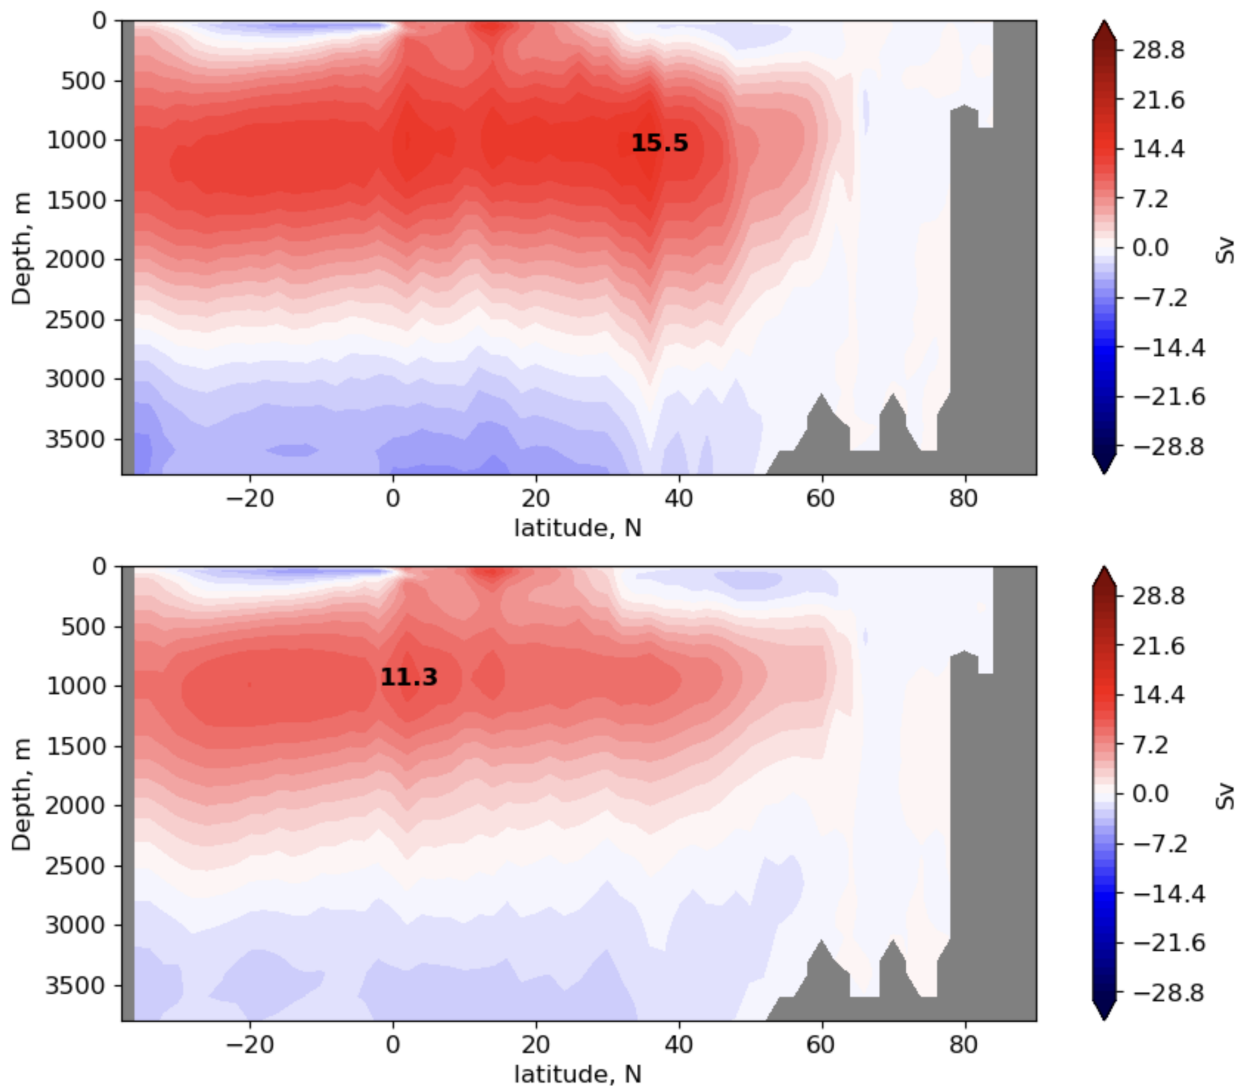

86

87 Figure S4: Atlantic Meridional Streamfunction [Sv] for HR simulation, upper: average for years 2000-2009; lower: average for  
88 years 2090-2099. The number indicates the maximum value of the streamfunction in the northern Hemisphere.



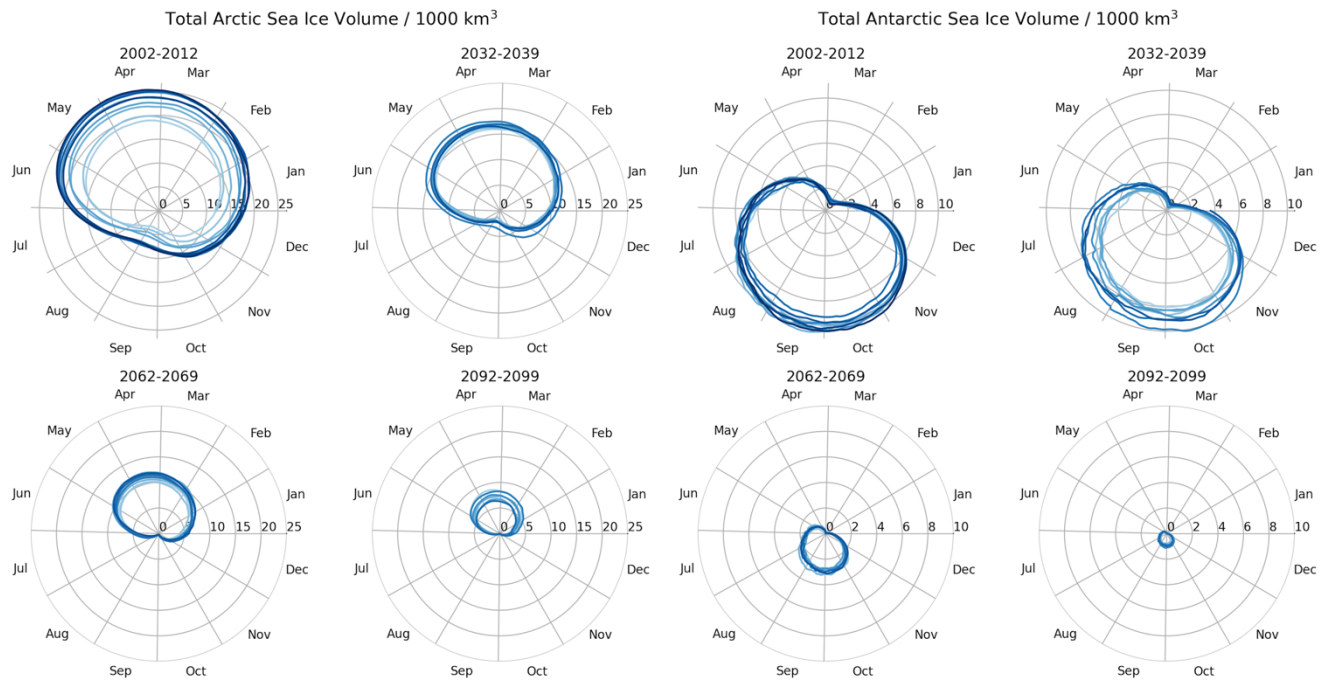

89

90 **Figure S5: Seasonal cycle of sea-ice volume in Arctic Ocean (left) and Southern Ocean (right) for 2000s and 2030s HR snapshot**  
 91 **simulations. Unit [1000 km<sup>3</sup>]. The sea ice amplitude in the phase-wheel diagram is represented by the radius and the seasonal phase**  
 92 **by the angle.**

93

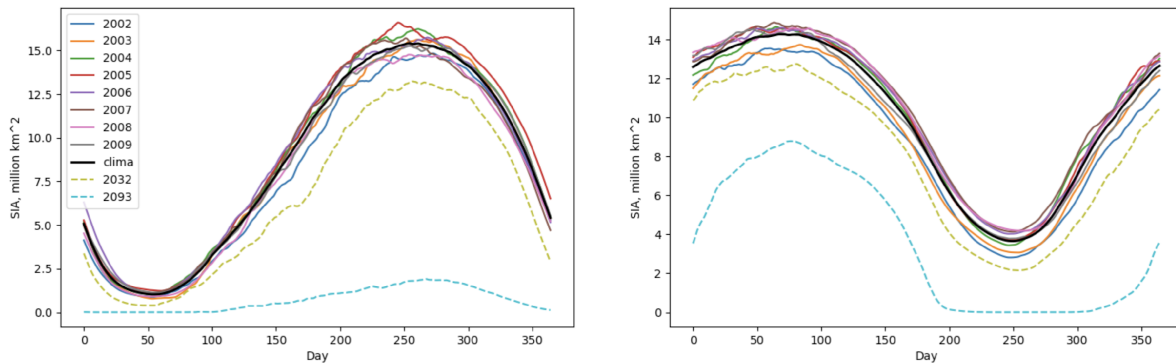

94

95 **Figure S6: Seasonal evolution of sea ice area in Southern Ocean (left), Arctic Ocean (right) for individual years from 2002-2009,**  
 96 **climatology and for future snapshot simulation for years 2032 and 2093.**

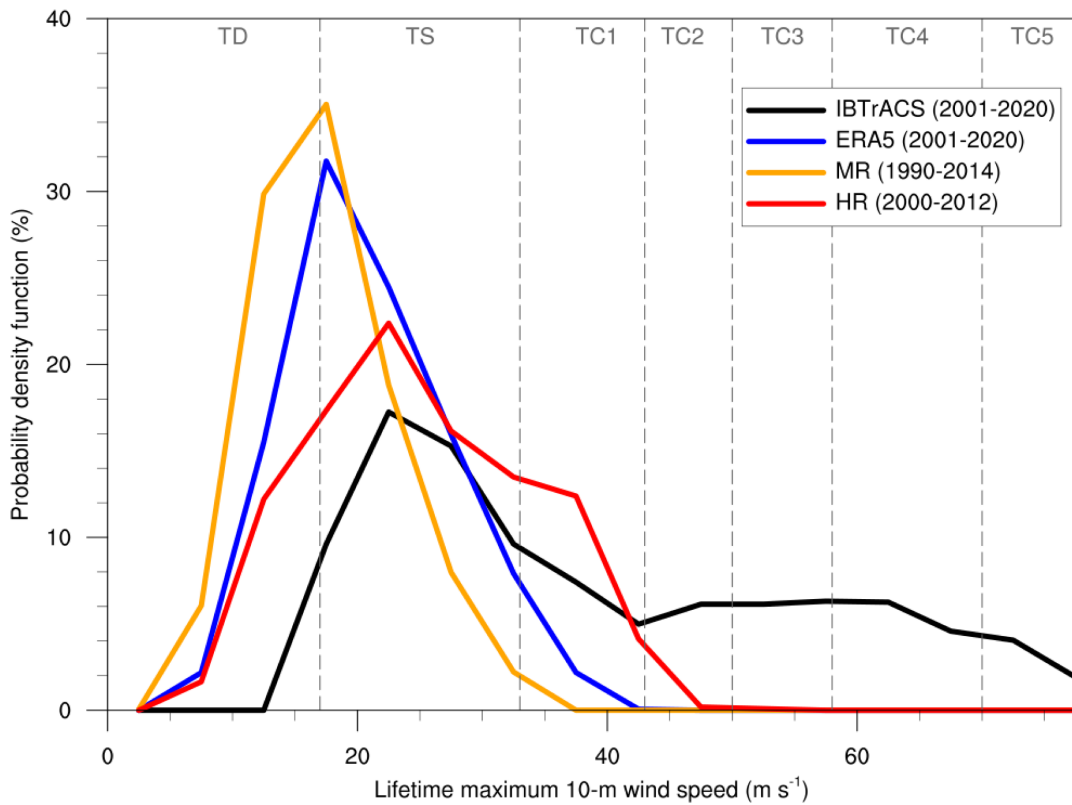

97

98 **Figure S7: Probability distribution of present-day lifetime maximum 10 m wind speed ( $\text{m s}^{-1}$ ) for tropical cyclones, detected using**  
 99 **the OWPZ tracking scheme (see methods in Supplementary S1 and S2) for AWI-CM3 MR and HR simulations. Observation data**  
 00 **is obtained from the International Best Track Archive for Climate Stewardship (IBTrACS) best track database version 4 (Knapp**  
 01 **et al., 2010).**

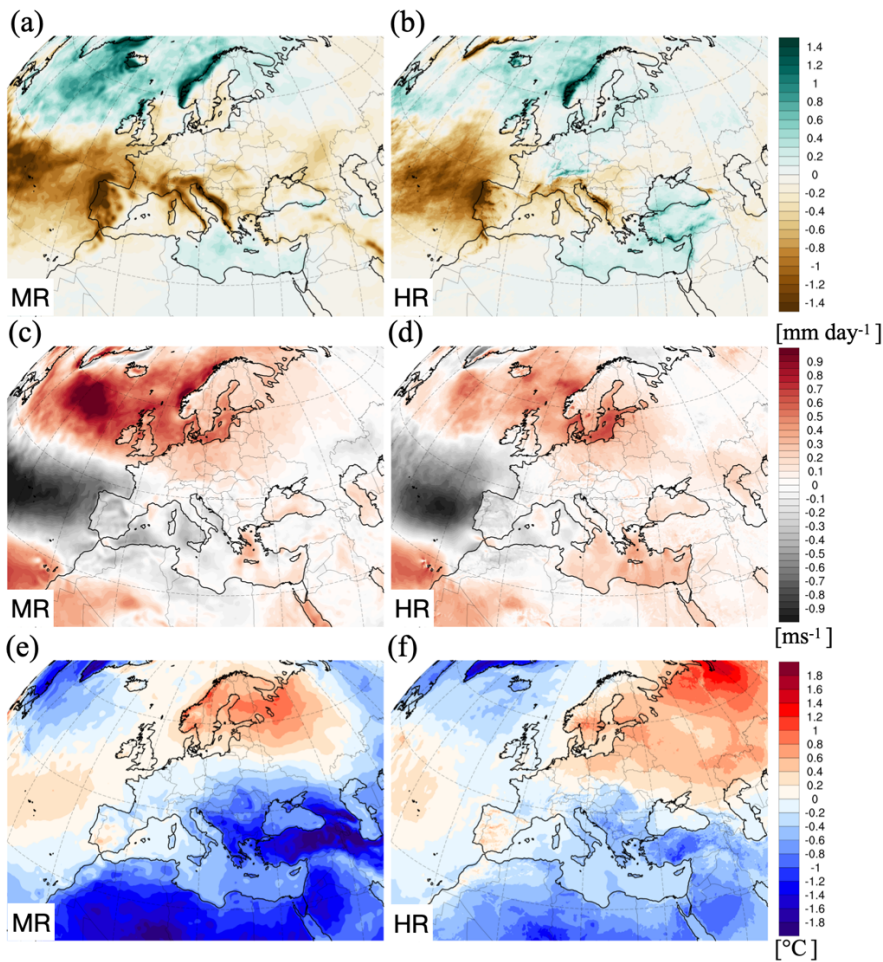

02  
 03 **Figure S8: Precipitation ( $\text{mmday}^{-1}$ ) regression with North Atlantic Oscillation Index using 15 years of the MR simulation (2085-**  
 04 **2099) (a) and HR simulation (2090-2099 and 2090-2094) (b). (c) and (d), same as (a) and (b), but for the wind speed ( $\text{ms}^{-1}$ ). (e) and**  
 05 **(f), same as (a) and (b), but for the surface temperature ( $^{\circ}\text{C}$ ). The NAO index is based on the leading empirical orthogonal function**  
 06 **of DJF seasonal mean sea level pressure anomalies over the North Atlantic and is normalized.**

07  
 08

09

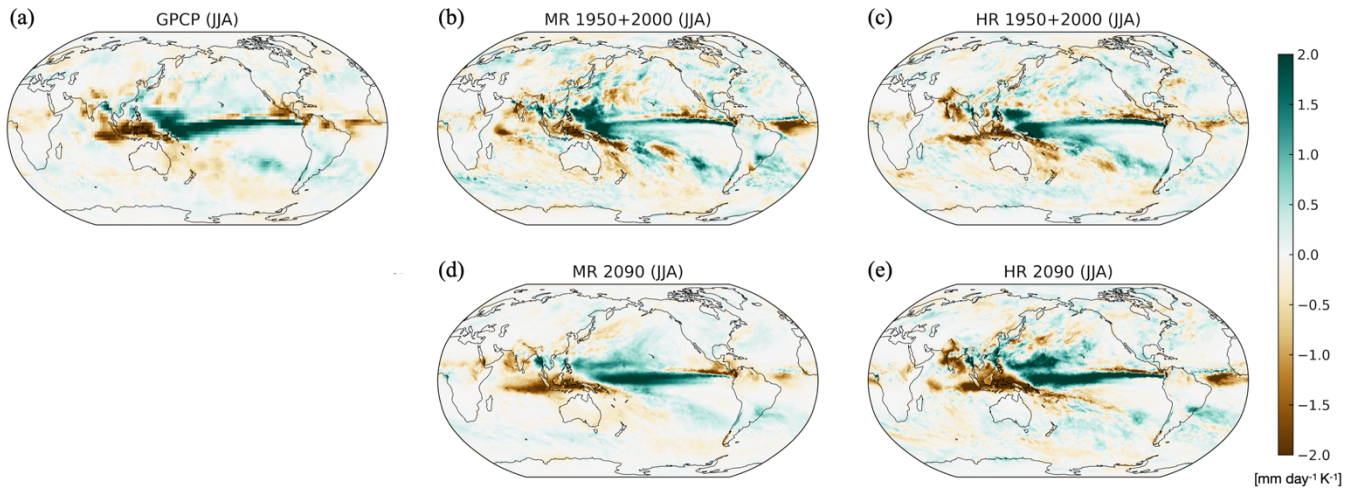

10

11 **Figure S9: Regression between observed JJA Niño 3.4 SST anomalies and (a) observed rainfall (GPCP); (b) same as (a), but for MR**  
12 **(32 years of present-day climate); (c), same as (a), but for HR (32 years of present-day climate); (d), same (a)(b), but for 2090-2099**  
13 **period (10+5 years); (e), same as (c), but for 2090-2099 period (10+5 years).**

14

15

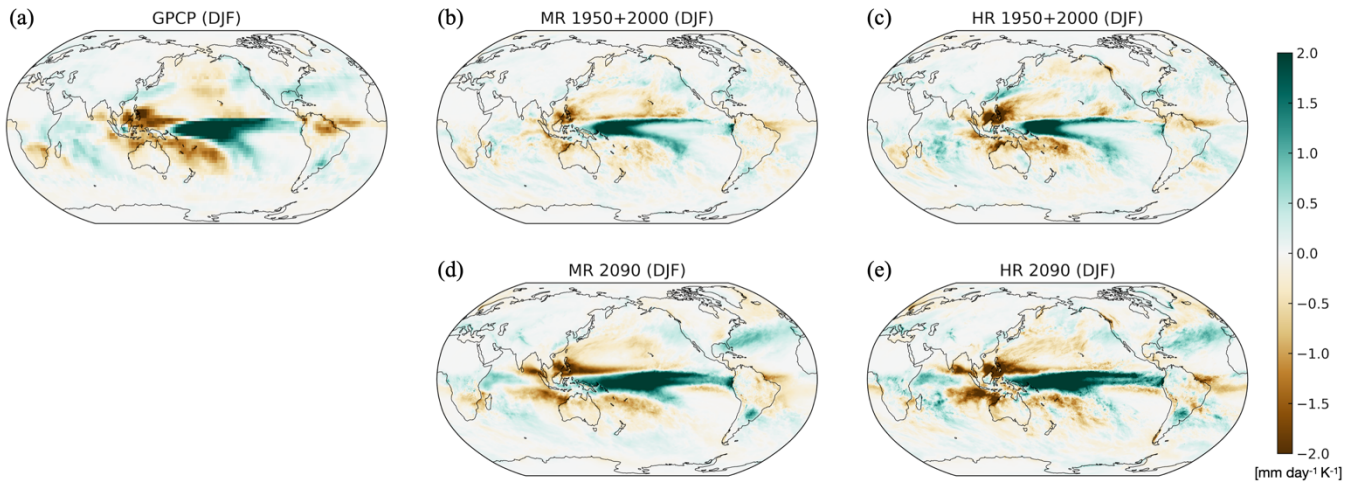

16

17 **Figure S10: Regression between observed DJF Niño 3.4 SST anomalies and (a) observed rainfall (GPCP); (b) same as (a), but for MR**  
18 **(32 years of present-day climate); (c), same as (a), but for HR (32 years of present-day climate); (d), same (a)(b), but for 2090-**  
19 **2099 period (10+5 years); (e), same as (c), but for 2090-2099 period (10+5 years).**

20

21

22

23

24 **References**

- 25 Kato, S., Rose, F. G., Rutan, D. A., Thorsen, T. J., Loeb, N. G., Doelling, D. R., Huang, X. L., Smith, W. L., Su, W. Y., and  
26 Ham, S. H.: Surface Irradiances of Edition 4.0 Clouds and the Earth's Radiant Energy System (CERES) Energy Balanced  
27 and Filled (EBAF) Data Product, *J. Climate*, 31, 4501-4527, <https://doi.org/10.1175/jcli-d-17-0523.1>, 2018.
- 28 Knapp, K. R., Kruk, M. C., Levinson, D. H., Diamond, H. J., and Neumann, C. J.: THE INTERNATIONAL BEST TRACK  
29 ARCHIVE FOR CLIMATE STEWARDSHIP (IBTrACS) Unifying Tropical Cyclone Data, *B. Am. Meteorol. Soc.*, 91,  
30 363-376, <https://doi.org/10.1175/2009bams2755.1>, 2010.
- 31 Raavi, P. H., Chu, J. E., Timmermann, A., Lee, S. S., and Walsh, K. J. E.: Moisture control of tropical cyclones in high-  
32 resolution simulations of paleoclimate and future climate, *Nat. Commun.*, 14, 6426, [https://doi.org/10.1038/s41467-023-  
33 42033-8](https://doi.org/10.1038/s41467-023-42033-8), 2023.
- 34 Steele, M., Morley, R., and Ermold, W.: PHC: A global ocean hydrography with a high-quality Arctic Ocean, *J. Climate*, 14,  
35 2079-2087, [https://doi.org/10.1175/1520-0442\(2001\)014<2079:pagohw>2.0.co;2](https://doi.org/10.1175/1520-0442(2001)014<2079:pagohw>2.0.co;2), 2001.
- 36 Tory, K. J., Chand, S. S., Dare, R. A., and McBride, J. L.: An Assessment of a Model-, Grid-, and Basin-Independent Tropical  
37 Cyclone Detection Scheme in Selected CMIP3 Global Climate Models, *J. Climate*, 26, 5508-5522,  
38 <https://doi.org/10.1175/jcli-d-12-00511.1>, 2013a.
- 39 Tory, K. J., Chand, S. S., Dare, R. A., and McBride, J. L.: The Development and Assessment of a Model-, Grid-, and Basin-  
40 Independent Tropical Cyclone Detection Scheme, *J. Climate*, 26, 5493-5507, <https://doi.org/10.1175/jcli-d-12-00510.1>,  
41 2013b.  
42
